# Supplementary material for: A unique hormonal recognition feature of the human glucagon-like peptide-2 receptor
Source: PubMed Central journal article supplement (PMC7785020; doi:10.1038/s41422-020-00442-0), 2020-11-25
Supplement: 41422_2020_442_MOESM9_ESM.pdf [file 41422_2020_442_MOESM9_ESM.pdf]

**Supplementary information, Table. S1 | Cryo-EM data collection, refinement and validation statistics.**

| GLP-2-GLP-2R-G <sub>s</sub> complex                 | Value       |
|-----------------------------------------------------|-------------|
| <b>Data collection and processing</b>               |             |
| Magnification                                       | 49310       |
| Voltage (kV)                                        | 300         |
| Electron exposure (e <sup>-</sup> /Å <sup>2</sup> ) | 64          |
| Defocus range (μm)                                  | -0.5 ~ -2.5 |
| Pixel size (Å)                                      | 1.014       |
| Symmetry imposed                                    | C1          |
| Initial particle projections (no.)                  | 1,498,893   |
| Final particle projections (no.)                    | 284,669     |
| Map resolution (Å)                                  | 3.0         |
| FSC threshold                                       | 0.143       |
| Map resolution range (Å)                            | 2.5-5.0     |
| <b>Refinement</b>                                   |             |
| Initial model used (PDB code)                       | 6NBF        |
| Model resolution (Å)                                | 3.1         |
| FSC threshold                                       | 0.5         |
| Model resolution range (Å)                          | 2.5-5.0     |
| Map sharpening <i>B</i> factor (Å <sup>2</sup> )    | -94.5881    |
| Model composition                                   |             |
| Non-hydrogen atoms                                  | 8566        |
| Protein residues                                    | 1070        |
| Water                                               | 7           |
| <i>B</i> factors (Å <sup>2</sup> )                  |             |
| Protein                                             | 58.72       |
| Water                                               | 30.00       |
| R.M.S. deviations                                   |             |
| Bond lengths (Å)                                    | 0.004       |
| Bond angles (°)                                     | 0.648       |
| Validation                                          |             |
| MolProbity score                                    | 1.77        |
| Clash score                                         | 7.98        |
| Poor rotamers (%)                                   | 0.76        |
| Ramachandran plot                                   |             |
| Favored (%)                                         | 95.15       |
| Allowed (%)                                         | 4.75        |
| Disallowed (%)                                      | 0.10        |
