# Supplementary material for: A unique hormonal recognition feature of the human glucagon-like peptide-2 receptor
Source: PubMed Central journal article supplement (PMC7785020; doi:10.1038/s41422-020-00442-0), 2020-11-25
Supplement: 41422_2020_442_MOESM11_ESM.pdf [file 41422_2020_442_MOESM11_ESM.pdf]

**Supplementary information, Table. S3 | Effects of residue mutation in the ligand-binding pocket on GLP-2R-induced cAMP accumulation<sup>a</sup>.**

| Receptor mutant        | Human GLP-2(1-33)      |                                       |
|------------------------|------------------------|---------------------------------------|
|                        | pEC <sub>50</sub> ±SEM | E <sub>max</sub> (% WT <sup>b</sup> ) |
| GLP-2R (1-553) (WT)    | 10.4±0.05              | 100.9±2.4                             |
| Y182 <sup>1.43</sup> A | 9.6±0.08               | 101.8±3.9                             |
| Y186 <sup>1.47</sup> A | 9.2±0.06**             | 100.3±2.8                             |
| K231 <sup>2.67</sup> A | 9.9±0.07               | 105.1±3.0                             |
| R242 <sup>ECL1</sup> E | 9.1±0.03**             | 108.2±1.9                             |
| R242 <sup>ECL1</sup> A | 9.8±0.07               | 106.7±3.4                             |
| W249 <sup>ECL1</sup> A | 7.2±0.7***             | 127.9±161.5                           |
| Y252 <sup>ECL1</sup> A | 9.8±0.06               | 103.1±2.6                             |
| H268 <sup>3.37</sup> A | 7.8±0.2***             | 118.4±22.6                            |
| N334 <sup>ECL2</sup> A | 9.6±0.06               | 102.7±2.9                             |
| W340 <sup>5.36</sup> A | 8.9±0.06***            | 106.8±3.6                             |
| R344 <sup>5.40</sup> A | 9.2±0.05**             | 108.6±2.8                             |
| K414 <sup>7.35</sup> A | 9.8±0.07               | 110.0±3.3                             |

<sup>a</sup>All data were fitted with a three-parameter logistic curve to obtain pEC<sub>50</sub> values. Data represent means ± S.E.M. of at least three independent experiments performed duplicate. One-way ANOVA and Dunnett's post-test were used to determine statistical difference. \*P<0.05, \*\*P<0.01, \*\*\*P<0.001.

<sup>b</sup> WT, wild-type.
