# Supplementary material for: A unique hormonal recognition feature of the human glucagon-like peptide-2 receptor
Source: PubMed Central journal article supplement (PMC7785020; doi:10.1038/s41422-020-00442-0), 2020-11-25
Supplement: 41422_2020_442_MOESM13_ESM.pdf [file 41422_2020_442_MOESM13_ESM.pdf]

Supplementary information, Table. S5 | Effects of residue mutation in ECL1 on GLP-2R-induced cAMP accumulation by different ligands<sup>a</sup>.

| Receptor mutant               | GLP-2(1-33)            |                                       | GLP-1(1-31)            |                         | Chimeric GLP-1/GLP-2 (1-6) |                         | Chimeric GLP-1/GLP-2 (7-19) |                         | Chimeric GLP-1/GLP-2 (20-33) |                         |
|-------------------------------|------------------------|---------------------------------------|------------------------|-------------------------|----------------------------|-------------------------|-----------------------------|-------------------------|------------------------------|-------------------------|
|                               | pEC <sub>50</sub> ±SEM | E <sub>max</sub> (% WT <sup>b</sup> ) | pEC <sub>50</sub> ±SEM | E <sub>max</sub> (% WT) | pEC <sub>50</sub> ±SEM     | E <sub>max</sub> (% WT) | pEC <sub>50</sub> ±SEM      | E <sub>max</sub> (% WT) | pEC <sub>50</sub> ±SEM       | E <sub>max</sub> (% WT) |
| GLP-2R (WT)                   | 10.8±0.04              | 103.0±1.6                             | N.D. <sup>c</sup>      | N.D.                    | 9.8±0.05***                | 102.9±1.8               | 8.5±0.06***                 | 103.2±2.6               | 9.9±0.04***                  | 103.8±1.5               |
| GLP-1R (WT)                   | 8.3±1.1*               | 4.0±3.1***                            | 10.9±0.06              | 106.2±2.7               | 8.1±0.6*                   | 7.1±3.2***              | 10.9±0.06                   | 104.7±2.4               | 8.5±0.04*                    | 112.1±2.8               |
| GLP-2R R242 <sup>ECL1</sup> E | 9.6±0.06               | 103.0±2.3                             | 8.6±0.9                | -2.2±0.9***             | 7.6±0.06*                  | 108.3±3.2               | 7.4±0.09*                   | 107.8±5.5               | 8.3±0.07                     | 103.2±3.5               |
| GLP-2R R242 <sup>ECL1</sup> A | 9.9±0.06               | 103.6±2.3                             | N.D.                   | N.D.                    | 8.1±0.07***                | 105.0±3.2               | 7.6±0.09***                 | 106.4±4.9               | 8.9±0.08***                  | 102.0±3.1               |
| GLP-2R D244 <sup>ECL1</sup> A | 10.8±0.07              | 101.2±2.8                             | N.D.                   | N.D.                    | 9.6±0.06***                | 102.0±2.5               | 8.5±0.04***                 | 102.0±1.8               | 9.6±0.05***                  | 103.6±1.8               |
| GLP-2R N247 <sup>ECL1</sup> A | 11.1±0.05              | 102.6±1.8                             | N.D.                   | N.D.                    | 10.4±0.05***               | 101.9±1.8               | 8.9±0.07***                 | 102.2±2.8               | 10.3±0.05***                 | 102.9±1.8               |
| GLP-2R W249 <sup>ECL1</sup> A | 7.4±0.07               | 113.2±4.1                             | 8.6±0.7                | -2.4±0.7                | 5.9±0.6                    | 226.4±219.9             | N.D.                        | N.D.                    | 5.2±2.8                      | 953.1±5657.0            |
| GLP-2R Y252 <sup>ECL1</sup> A | 10.1±0.05              | 102.3±2.2                             | 9.2±3.6                | -0.7±1.1***             | 8.2±0.07                   | 102.8±3.1               | 7.3±0.08                    | 106.4±5.1               | 8.4±0.05                     | 103.7±2.1               |

<sup>a</sup>All data were fitted with a three-parameter logistic curve to obtain pEC<sub>50</sub> values. Data represent means ± S.E.M. of at least three independent experiments performed duplicate. One-way ANOVA and Dunnett's post-test were used to determine statistical difference. \*P<0.05, \*\*P<0.01, \*\*\*P<0.001.

<sup>b</sup> WT, wild-type.
